# Supplementary material for: Engineering the ligand states by surface functionalization: a new way to enhance the ferromagnetism of CrI3
Source: Royal Society of Chemistry journal article supplement (doi:10.1039/d0nr07909j), 2021-01-01
Supplement: d0nr07909j1.pdf [file d0nr07909j1.pdf]

## Supporting Information

Engineering the ligand states by surface functionalization: A new way to enhance the ferromagnetism of CrI<sub>3</sub>

Table S1. 2×2 supercell of pristine monolayer CrI<sub>3</sub>. The exchange energy (EX) and magnetic anisotropy energy (MA) that calculated by PBE and PBE+U with different values of U-J.

| U-J (eV) | PBE   | 1.3 | 2.0   | 2.3   | 3.3   |
|----------|-------|-----|-------|-------|-------|
| EX (meV) | 157.2 | 186 | 201.2 | 208.0 | 231.2 |
| MA (meV) | 6.2   | 2.8 | 3.7   | 4.2   | 7.6   |

Table S2. 2×2 supercell of CrI<sub>3</sub> adsorbed with single F-atom (F@CrI<sub>3</sub>)

| U-J (eV) | PBE   | 1.0   | 2.0   | 3.0   | 4.0   |
|----------|-------|-------|-------|-------|-------|
| EX (meV) | 339.1 | 341.5 | 348.7 | 361.2 | 380.0 |
| MA (meV) | 7.6   | 7.5   | 8.5   | 9.7   | 11.2  |

Table S3. 2×2 supercell of FF@CrI<sub>3</sub>

| U-J (eV) | PBE    | 1.0    | 2.0    | 3.0    | 4.0    |
|----------|--------|--------|--------|--------|--------|
| EX (meV) | 3037.6 | 2994.4 | 2905.2 | 2801.2 | 2690.0 |
| MA (meV) | 9.6    | 22.8   | 39.6   | 61.6   | 85.6   |

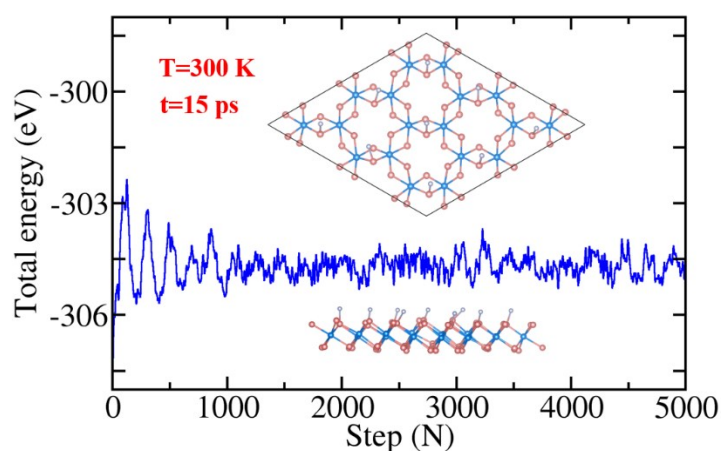

Figure S1. The molecular dynamical simulation result for CrI<sub>3</sub> adsorbed with 33.3% F-atom at T=300 K.

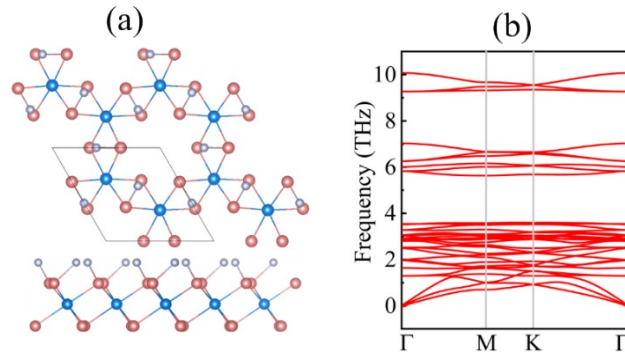

Figure S2. The atomic structure (a) and the phonon spectrum (b) of fully F-functionalized CrI<sub>3</sub>

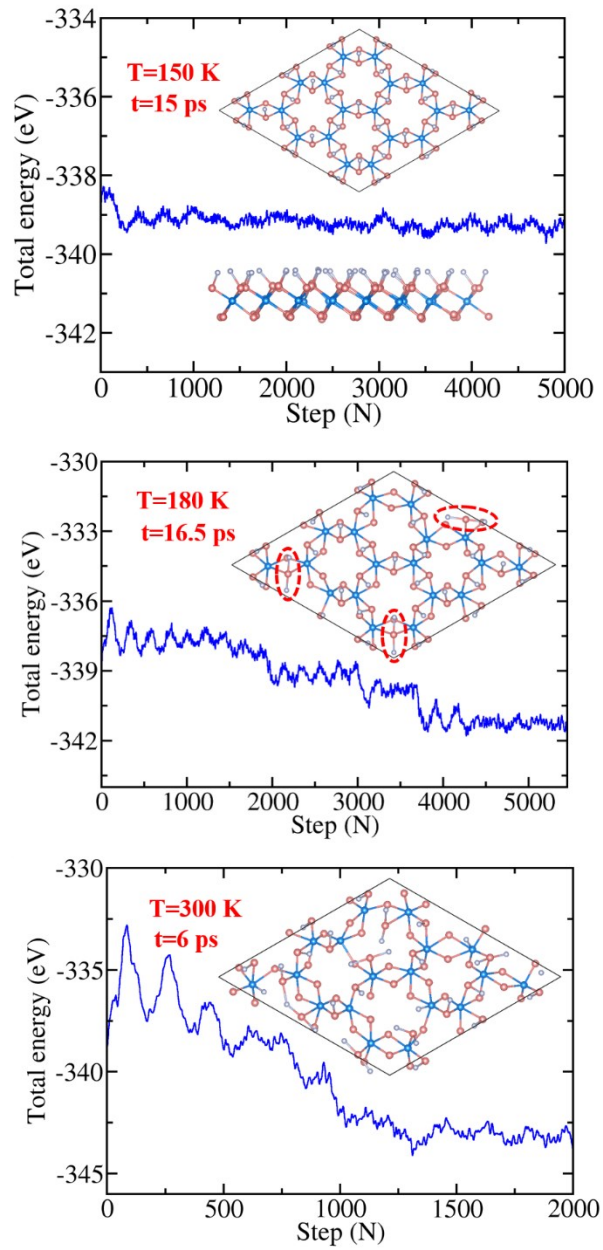

Figure S3. The molecular dynamical simulation results for FF@CrI<sub>3</sub> at different temperature.
